# Supplementary material for: Porous layered ZnV2O4@C synthesized based on a bimetallic MOF as a stable cathode material for aqueous zinc ion batteries
Source: Royal Society of Chemistry journal article supplement (doi:10.1039/d4dt01062k), 2024-01-01
Supplement: d4dt01062k1.pdf [file d4dt01062k1.pdf]

## Supporting information

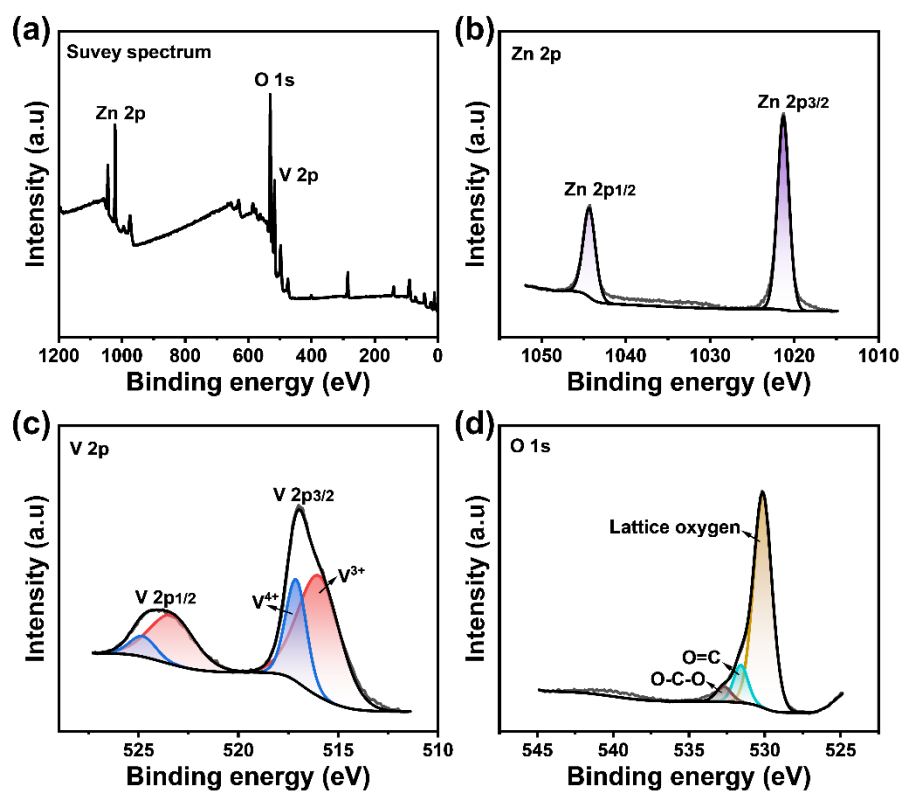

Fig. S1. (a) Survey XPS spectra of ZVO; (b) V 2p XPS spectra of ZVO; (c) Zn 2p XPS spectra of ZVO; (d) O 1s XPS spectra of ZVO.

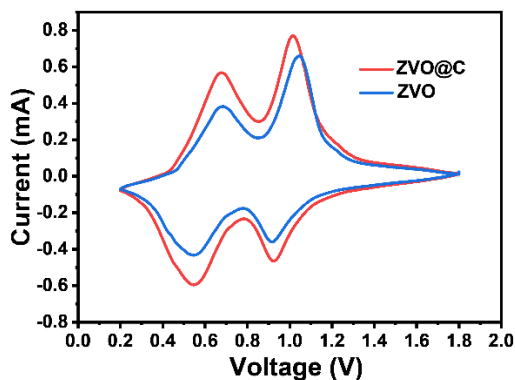

Fig. S2. The third CV curves of ZVO and ZVO@C at the scan rate of 0.1 mV s<sup>-1</sup>.

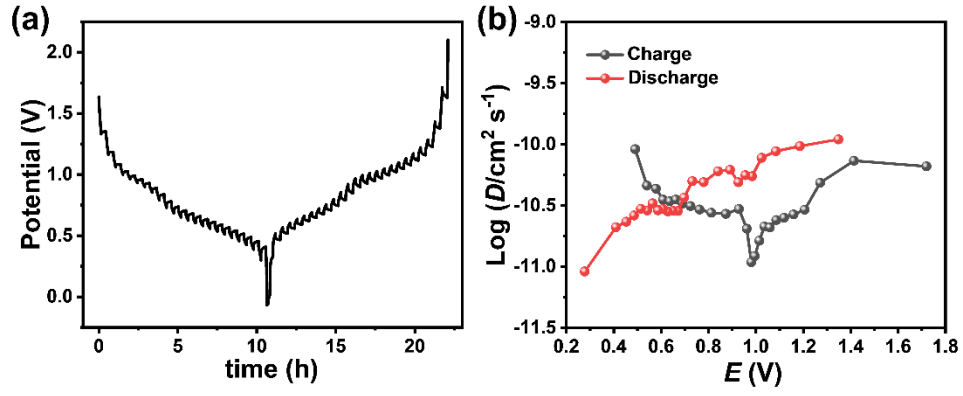

Fig. S3. (a, b) The GITT curves and the related diffusion coefficient of  $\text{Zn}^{2+}$  for the ZVO electrode.

**Table S1.** Electrochemical impedance  $R_s$  and  $R_{ct}$  values for ZVO and ZVO@C.

| Cathode      | $R_s$ ( $\Omega$ ) | $R_{ct}$ ( $\Omega$ ) |
|--------------|--------------------|-----------------------|
| ZVO-Before   | 0.581              | 486.9                 |
| ZVO@C-Before | 0.757              | 268.5                 |
| ZVO-10th     | 0.417              | 122.0                 |
| ZVO@C-10th   | 0.742              | 63.0                  |
